# Supplementary material for: Bulgarian General Practitioners’ Communication Styles about Child Vaccinations, Mainly Focused on Parental Decision Making in the Context of a Mandatory Immunization Schedule
Source: MDPI journal article supplement (doi:10.3390/healthcare11182566), 2023-09-17
Supplement: s1 [file s1]

**Table S1. Questionnaire**

|                                                                                                                                                         |                                                                                                              |
|---------------------------------------------------------------------------------------------------------------------------------------------------------|--------------------------------------------------------------------------------------------------------------|
| <b>Profile of the Respondent</b>                                                                                                                        |                                                                                                              |
| What is your gender?                                                                                                                                    | Male<br>Female<br>Other                                                                                      |
| What is your age?                                                                                                                                       | number                                                                                                       |
| What is the number of patients in your practice?                                                                                                        | number                                                                                                       |
| Haw many children you have enrolled in your practice?                                                                                                   | number                                                                                                       |
| Where your practice is mainly settled?                                                                                                                  | Capital city<br>Regional city<br>Small town<br>Village                                                       |
| What is your practice?                                                                                                                                  | Solo practice<br>Group practice                                                                              |
| What is your specialty?                                                                                                                                 | General Medicine<br>Pediatrics<br>Internal Medicine<br>Other. Please, specify...                             |
| <b>TRUST</b>                                                                                                                                            |                                                                                                              |
| <b>Please share how much you trust the following factors related to vaccines from the children's immunization calendar of the Republic of Bulgaria.</b> |                                                                                                              |
| <b>I have trust in the information on vaccines from official authorities (WHO, ECDC)</b>                                                                | 5 point Likert Scale, ranging from Strongly agree to Strongly disagree, option for "I do not wish to answer" |
| <b>I have trust in the information on vaccines from Bulgarian official authorities (MoH and others)</b>                                                 | 5 point Likert Scale, ranging from Strongly agree to Strongly disagree, option for "I do not wish to answer" |
| <b>I have trust in the information on vaccines from pharmaceutical companies</b>                                                                        | 5 point Likert Scale, ranging from Strongly agree to Strongly disagree, option for "I do not wish to answer" |
| <b>I have trust in the information on vaccines from other GPs</b>                                                                                       | 5 point Likert Scale, ranging from Strongly agree to Strongly disagree, option for "I do not wish to answer" |
| <b>I have trust in the practices on vaccines from official authorities (WHO, ECDC)</b>                                                                  | 5 point Likert Scale, ranging from Strongly agree to Strongly disagree, option for "I do not wish to answer" |
| <b>I have trust in the practices on vaccines from Bulgarian official authorities (MoH and others)</b>                                                   | 5 point Likert Scale, ranging from Strongly agree to Strongly disagree, option for "I do not wish to answer" |

|                                                                                                                                                                                                                                                |                                                                                                              |
|------------------------------------------------------------------------------------------------------------------------------------------------------------------------------------------------------------------------------------------------|--------------------------------------------------------------------------------------------------------------|
| <b>I have trust in the practices on vaccines from pharmaceutical companies</b>                                                                                                                                                                 | 5 point Likert Scale, ranging from Strongly agree to Strongly disagree, option for "I do not wish to answer" |
| <b>ATTITUDES TOWARDS VACCINES</b>                                                                                                                                                                                                              |                                                                                                              |
| <b>And now let's talk about the vaccines from the mandatory children's immunization calendar. Can you share your overall assessment of the following statements:</b>                                                                           |                                                                                                              |
| <b>Vaccines are important for children to have</b>                                                                                                                                                                                             | 5 point Likert Scale, ranging from Strongly agree to Strongly disagree, option for "I do not wish to answer" |
| <b>Vaccines are safe</b>                                                                                                                                                                                                                       | 5 point Likert Scale, ranging from Strongly agree to Strongly disagree, option for "I do not wish to answer" |
| <b>Vaccines are effective</b>                                                                                                                                                                                                                  | 5 point Likert Scale, ranging from Strongly agree to Strongly disagree, option for "I do not wish to answer" |
| <b>It's good the vaccines are mandatory</b>                                                                                                                                                                                                    | 5 point Likert Scale, ranging from Strongly agree to Strongly disagree, option for "I do not wish to answer" |
| <b>All vaccines from the schedule are important</b>                                                                                                                                                                                            | 5 point Likert Scale, ranging from Strongly agree to Strongly disagree, option for "I do not wish to answer" |
| <b>I generally approve the Bulgarian immunization calendar</b>                                                                                                                                                                                 | 5 point Likert Scale, ranging from Strongly agree to Strongly disagree, option for "I do not wish to answer" |
| <b>Generally, the diseases for which there are mandatory vaccines are dangerous</b>                                                                                                                                                            | 5 point Likert Scale, ranging from Strongly agree to Strongly disagree, option for "I do not wish to answer" |
| <b>EXPERIENCE AND HESITANCY AMONG PARENTS</b>                                                                                                                                                                                                  |                                                                                                              |
| <b>In your practice as a General Practitioner in the last 5 years, have there been any cases of illnesses from diseases against which mandatory immunizations from the children's immunization calendar in Bulgaria are currently applied?</b> | Yes, without administered vaccine<br>Yes, with administered vaccine<br>No<br>I cannot answer                 |
| <b>In your practice as a GP in the last 5 years, have there been any cases of serious adverse effects following compulsory vaccination of children that were potentially associated with hospitalization or disability?</b>                    | Yes<br>No<br>I cannot answer                                                                                 |
| <b>Do the parents of children from your practice have doubts regarding the administration of vaccines from the mandatory children's immunization calendar?</b>                                                                                 | Yes, often<br>Yes, rarely<br>No<br>I cannot answer                                                           |

|                                                                                                                                           |                                                                                                                               |
|-------------------------------------------------------------------------------------------------------------------------------------------|-------------------------------------------------------------------------------------------------------------------------------|
| <b>Has there been a change in parents' vaccine attitudes about mandatory childhood vaccines since the start of the Covid-19 pandemic?</b> | Yes, there are less vaccine hesitant parents<br>Yes, there are more vaccine hesitant parents<br>No<br>I cannot answer         |
| <b>Are there children in your practice who have missed mandatory vaccinations for which they are eligible due to delay or refusal?</b>    | Yes, due to refusal<br>Yes, due to delay<br>Yes, due to medical reasons<br>No<br>I cannot answer                              |
| <b>To what extent do you have difficulty communicating with parents regarding the vaccination of their children?</b>                      | To a great extent<br>To small extent<br>I do not experience any difficulties in communicating with parents<br>I cannot answer |
| <b>COMMUNICATION</b>                                                                                                                      |                                                                                                                               |
| <b>How much do you agree with the following statements:</b>                                                                               |                                                                                                                               |
| <b>I generally feel comfortable in front of parents when explaining about vaccines</b>                                                    | 5 point Likert Scale, ranging from Strongly agree to Strongly disagree, option for "I do not wish to answer"                  |
| <b>I don't have enough time to spend explaining to parents</b>                                                                            | 5 point Likert Scale, ranging from Strongly agree to Strongly disagree, option for "I do not wish to answer"                  |
| <b>GPs do not have a choice to administer or not to administer vaccines – this sometimes makes communication with parents tense</b>       | 5 point Likert Scale, ranging from Strongly agree to Strongly disagree, option for "I do not wish to answer"                  |
| <b>In my practice as a general practitioner, I do not allow children to remain unvaccinated due to a parent's refusal</b>                 | 5 point Likert Scale, ranging from Strongly agree to Strongly disagree, option for "I do not wish to answer"                  |
| <b>Parents who hesitate and delay vaccines hinder my work</b>                                                                             | 5 point Likert Scale, ranging from Strongly agree to Strongly disagree, option for "I do not wish to answer"                  |
| <b>I do not accept in my practice parents who do not wish to vaccinate their children</b>                                                 | 5 point Likert Scale, ranging from Strongly agree to Strongly disagree, option for "I do not wish to answer"                  |
| <b>My role is to explain to parents the benefits of vaccines, even if they initially hesitate or refuse to vaccinate their children</b>   | 5 point Likert Scale, ranging from Strongly agree to Strongly disagree, option for "I do not wish to answer"                  |
| <b>I explain to parents the side effects of vaccines, as well as the risks of vaccine-preventable diseases</b>                            | 5 point Likert Scale, ranging from Strongly agree to Strongly disagree, option for "I do not wish to answer"                  |
| <b>I try to understand parents' hesitations</b>                                                                                           | 5 point Likert Scale, ranging from Strongly agree to Strongly disagree, option for "I do not wish to answer"                  |
| <b>I inform the parents, but the choice is theirs</b>                                                                                     | 5 point Likert Scale, ranging from Strongly agree to Strongly disagree, option for "I do not wish to answer"                  |

|                                                                                                          |                                                                                                                                                                                                                                                                                                                                                                                                                                                                                                                                                                              |
|----------------------------------------------------------------------------------------------------------|------------------------------------------------------------------------------------------------------------------------------------------------------------------------------------------------------------------------------------------------------------------------------------------------------------------------------------------------------------------------------------------------------------------------------------------------------------------------------------------------------------------------------------------------------------------------------|
| <b>I am pushing for vaccinations</b>                                                                     | 5 point Likert Scale, ranging from Strongly agree to Strongly disagree, option for "I do not wish to answer"                                                                                                                                                                                                                                                                                                                                                                                                                                                                 |
| <b>The decision to vaccinate is the parents' responsibility</b>                                          | 5 point Likert Scale, ranging from Strongly agree to Strongly disagree, option for "I do not wish to answer"                                                                                                                                                                                                                                                                                                                                                                                                                                                                 |
| <b>RECOMMENDATIONS AND OTHER QUESTIONS</b>                                                               |                                                                                                                                                                                                                                                                                                                                                                                                                                                                                                                                                                              |
| <b>How often do you recommend vaccines that are NOT included in the mandatory immunization schedule?</b> | Always<br>Often<br>Rarely Never<br>I cannot answer                                                                                                                                                                                                                                                                                                                                                                                                                                                                                                                           |
| <b>Please chose which are your three main preferred sources of information?</b>                          | Official health organizations and institutions<br>Professional associations<br>Vaccine producers (pharmaceutical companies)<br>Specialized medical websites<br>Other general practitioners<br>Medical Journals<br>Social media groups for medics<br>Mesia<br>Other. Please, specify...                                                                                                                                                                                                                                                                                       |
| <b>Which of the following would most improve your work? (up to 3 answers, multiple)</b>                  | Electronic system for tracking vaccination status<br>Automated messages to patients to remind them of their vaccination dates<br>Special procedure for payment by patients for consultations on vaccines<br>A hotline to give information to GPs about vaccines<br>Electronic resources to provide new information for GPs about vaccines<br>Leaflets on the benefits and risks of each vaccine intended for GPs<br>Leaflets about the benefits and risks of each vaccine intended for patients<br>Public campaigns for the benefit of vaccines<br>Other. Please, specify... |

**Table S2.** Relationships between Factor mean scores and general characteristics of the practice. ANOVA analysis. Mean factor scores and Std. Deviation presented.

| Question |  | Factor mean scores |
|----------|--|--------------------|
|----------|--|--------------------|

| Type of settlement  |                   | Factor1<br>MEAN<br>(Active<br>communicat<br>or) | Factor2<br>MEAN<br>(Restrictive<br>communicat<br>or) | Factor3<br>MEAN<br>(Informing<br>communicat<br>or) | Factor4<br>MEAN<br>(Strained<br>communicat<br>or) |
|---------------------|-------------------|-------------------------------------------------|------------------------------------------------------|----------------------------------------------------|---------------------------------------------------|
| F                   |                   | 2.185                                           | 22.926                                               | 12.09                                              | 8.993                                             |
| Sig                 |                   | 0.09                                            | 0.000                                                | 0.000                                              | 0.000                                             |
| The capital (Sofia) | Mean              | 1.6545                                          | 2.6587                                               | 1.7374                                             | 2.1094                                            |
|                     | N                 | 66                                              | 63                                                   | 66                                                 | 64                                                |
|                     | Std.<br>Deviation | 0.63976                                         | 1.27894                                              | 0.95634                                            | 0.85202                                           |
| Regional city       | Mean              | 1.6115                                          | 2.2899                                               | 1.6643                                             | 2.3406                                            |
|                     | N                 | 139                                             | 138                                                  | 141                                                | 138                                               |
|                     | Std.<br>Deviation | 0.59504                                         | 1.20342                                              | 0.90105                                            | 1.06192                                           |
| Small towns         | Mean              | 1.4737                                          | 3.2684                                               | 1.1803                                             | 2.9062                                            |
|                     | N                 | 95                                              | 95                                                   | 98                                                 | 96                                                |
|                     | Std.<br>Deviation | 0.30604                                         | 1.27957                                              | 0.43122                                            | 1.17274                                           |
| Village             | Mean              | 1.6383                                          | 3.7766                                               | 1.1884                                             | 2.2391                                            |
|                     | N                 | 47                                              | 47                                                   | 46                                                 | 46                                                |
|                     | Std.<br>Deviation | 0.36508                                         | 1.05711                                              | 0.635                                              | 1.16304                                           |
| Total               | Mean              | 1.5856                                          | 2.8324                                               | 1.4805                                             | 2.4419                                            |
|                     | N                 | 347                                             | 343                                                  | 351                                                | 344                                               |
|                     | Std.<br>Deviation | 0.51601                                         | 1.33291                                              | 0.81271                                            | 1.1103                                            |
| Age                 |                   | Factor1<br>MEAN<br>(Active<br>communicat<br>or) | Factor2<br>MEAN<br>(Restrictive<br>communicat<br>or) | Factor3<br>MEAN<br>(Informing<br>communicat<br>or) | Factor4<br>MEAN<br>(Strained<br>communicat<br>or) |
| F                   |                   | 0.087                                           | 0.83                                                 | 1.031                                              | 2.048                                             |
| Sig                 |                   | 0.967                                           | 0.478                                                | 0.379                                              | 0.107                                             |
| 31-40               | Mean              | 1.5091                                          | 2.6364                                               | 1.3636                                             | 1.6818                                            |
|                     | N                 | 11                                              | 11                                                   | 11                                                 | 11                                                |
|                     | Std.<br>Deviation | 0.56825                                         | 1.55066                                              | 0.64039                                            | 0.71668                                           |
| 41-50               | Mean              | 1.5889                                          | 2.7364                                               | 1.4906                                             | 2.4167                                            |
|                     | N                 | 54                                              | 55                                                   | 53                                                 | 54                                                |

| Question             |                   | Factor mean scores                              |                                                      |                                                    |                                                   |
|----------------------|-------------------|-------------------------------------------------|------------------------------------------------------|----------------------------------------------------|---------------------------------------------------|
| Type of settlement   |                   | Factor1<br>MEAN<br>(Active<br>communicat<br>or) | Factor2<br>MEAN<br>(Restrictive<br>communicat<br>or) | Factor3<br>MEAN<br>(Informing<br>communicat<br>or) | Factor4<br>MEAN<br>(Strained<br>communicat<br>or) |
|                      | Std.<br>Deviation | 0.60115                                         | 1.45569                                              | 0.82328                                            | 1.03135                                           |
| 51-60                | Mean              | 1.5913                                          | 2.943                                                | 1.5611                                             | 2.5219                                            |
|                      | N                 | 161                                             | 158                                                  | 161                                                | 160                                               |
|                      | Std.<br>Deviation | 0.51203                                         | 1.2794                                               | 0.88461                                            | 1.12623                                           |
| over 61              | Mean              | 1.5863                                          | 2.7155                                               | 1.3962                                             | 2.4174                                            |
|                      | N                 | 117                                             | 116                                                  | 122                                                | 115                                               |
|                      | Std.<br>Deviation | 0.48261                                         | 1.31913                                              | 0.72516                                            | 1.13155                                           |
| Total                | Mean              | 1.5866                                          | 2.8221                                               | 1.4861                                             | 2.4426                                            |
|                      | N                 | 343                                             | 340                                                  | 347                                                | 340                                               |
|                      | Std.<br>Deviation | 0.51702                                         | 1.33036                                              | 0.81574                                            | 1.1086                                            |
| Size of the practice |                   | Factor1<br>MEAN<br>(Active<br>communicat<br>or) | Factor2<br>MEAN<br>(Restrictive<br>communicat<br>or) | Factor3<br>MEAN<br>(Informing<br>communicat<br>or) | Factor4<br>MEAN<br>(Strained<br>communicat<br>or) |
| F                    |                   | 0.597                                           | 0.419                                                | 0.375                                              | 1.178                                             |
| sig                  |                   | 0.665                                           | 0.795                                                | 0.827                                              | 0.32                                              |
| 1-1000               | Mean              | 1.6361                                          | 2.8729                                               | 1.5269                                             | 2.275                                             |
|                      | N                 | 61                                              | 59                                                   | 62                                                 | 60                                                |
|                      | Std.<br>Deviation | 0.60167                                         | 1.3696                                               | 0.89228                                            | 1.01441                                           |
| 1001-2000            | Mean              | 1.5941                                          | 2.8413                                               | 1.4294                                             | 2.4532                                            |
|                      | N                 | 170                                             | 167                                                  | 170                                                | 171                                               |
|                      | Std.<br>Deviation | 0.51781                                         | 1.33318                                              | 0.75928                                            | 1.14949                                           |
| 2001-3000            | Mean              | 1.5718                                          | 2.8837                                               | 1.5249                                             | 2.5542                                            |
|                      | N                 | 85                                              | 86                                                   | 87                                                 | 83                                                |
|                      | Std.<br>Deviation | 0.50252                                         | 1.35836                                              | 0.86211                                            | 1.07355                                           |
| 3001-4000            | Mean              | 1.4667                                          | 2.4333                                               | 1.6                                                | 2.2333                                            |

| Question                              |                   | Factor mean scores                              |                                                      |                                                    |                                                   |
|---------------------------------------|-------------------|-------------------------------------------------|------------------------------------------------------|----------------------------------------------------|---------------------------------------------------|
| Type of settlement                    |                   | Factor1<br>MEAN<br>(Active<br>communicat<br>or) | Factor2<br>MEAN<br>(Restrictive<br>communicat<br>or) | Factor3<br>MEAN<br>(Informing<br>communicat<br>or) | Factor4<br>MEAN<br>(Strained<br>communicat<br>or) |
|                                       | N                 | 15                                              | 15                                                   | 15                                                 | 15                                                |
|                                       | Std.<br>Deviation | 0.34365                                         | 1.06682                                              | 0.77868                                            | 1.13179                                           |
| over 4001                             | Mean              | 1.4364                                          | 3                                                    | 1.5455                                             | 2.9091                                            |
|                                       | N                 | 11                                              | 11                                                   | 11                                                 | 11                                                |
|                                       | Std.<br>Deviation | 0.25009                                         | 1.28452                                              | 1.01404                                            | 1.09129                                           |
| Total                                 | Mean              | 1.5854                                          | 2.8447                                               | 1.4821                                             | 2.4515                                            |
|                                       | N                 | 342                                             | 338                                                  | 345                                                | 340                                               |
|                                       | Std.<br>Deviation | 0.51706                                         | 1.32997                                              | 0.81714                                            | 1.10703                                           |
| Percentage of children in<br>practice |                   | Factor1<br>MEAN<br>(Active<br>communicat<br>or) | Factor2<br>MEAN<br>(Restrictive<br>communicat<br>or) | Factor3<br>MEAN<br>(Informing<br>communicat<br>or) | Factor4<br>MEAN<br>(Strained<br>communicat<br>or) |
| F                                     |                   | 0.593                                           | 2.95                                                 | 2.096                                              | 0.575                                             |
| Sig                                   |                   | 0.553                                           | 0.054                                                | 0.125                                              | 0.563                                             |
| Up to 20%                             | Mean              | 1.5871                                          | 2.9438                                               | 1.4612                                             | 2.4206                                            |
|                                       | N                 | 170                                             | 169                                                  | 172                                                | 170                                               |
|                                       | Std.<br>Deviation | 0.52359                                         | 1.33344                                              | 0.81915                                            | 1.16069                                           |
| 21 - 40%                              | Mean              | 1.5361                                          | 3                                                    | 1.3196                                             | 2.5556                                            |
|                                       | N                 | 72                                              | 70                                                   | 73                                                 | 72                                                |
|                                       | Std.<br>Deviation | 0.40812                                         | 1.36997                                              | 0.54557                                            | 1.15538                                           |
| Over 41%                              | Mean              | 1.6263                                          | 2.5395                                               | 1.5812                                             | 2.3667                                            |
|                                       | N                 | 76                                              | 76                                                   | 78                                                 | 75                                                |
|                                       | Std.<br>Deviation | 0.5439                                          | 1.26429                                              | 0.88996                                            | 0.95625                                           |
| Total                                 | Mean              | 1.5849                                          | 2.8587                                               | 1.4582                                             | 2.4385                                            |
|                                       | N                 | 318                                             | 315                                                  | 323                                                | 317                                               |
|                                       | Std.<br>Deviation | 0.50439                                         | 1.33362                                              | 0.7876                                             | 1.11314                                           |

**Table S3.** Relationships between factors mean scores and general characteristics of the practice. Mean factor scores and St. Deviation displayed.

| Factor                                           |       | Question                  |     |        |                |                 |
|--------------------------------------------------|-------|---------------------------|-----|--------|----------------|-----------------|
|                                                  | Sig   | Type of the GPs' practice | N   | Mean   | Std. Deviation | Std. Error Mean |
| Factor1<br>(MEAN)<br>(Active communicat or)      | 0.911 | Individual                | 310 | 1.5845 | 0.5045         | 0.02865         |
|                                                  |       | Group                     | 37  | 1.5946 | 0.61189        | 0.10059         |
| Factor2<br>(MEAN)<br>(Restrictive communicat or) | 0.072 | Individual                | 306 | 2.8775 | 1.30843        | 0.0748          |
|                                                  |       | Group                     | 37  | 2.4595 | 1.48781        | 0.2446          |
| Factor3<br>(MEAN)<br>(Informing communicat or)   | 0.812 | Individual                | 314 | 1.4841 | 0.81862        | 0.0462          |
|                                                  |       | Group                     | 37  | 1.4505 | 0.77067        | 0.1267          |
| Factor4<br>(MEAN)<br>(Strained communicat or)    | 0.057 | Individual                | 306 | 2.482  | 1.1252         | 0.06432         |
|                                                  |       | Group                     | 38  | 2.1184 | 0.93313        | 0.15137         |
|                                                  |       | Gender                    | N   | Mean   | Std. Deviation | Std. Error Mean |
| Factor1<br>(MEAN)<br>(Active communicat or)      | 0.575 | Man                       | 101 | 1.6009 | 0.54065        | 0.05380         |
|                                                  |       | Women                     | 246 | 1.5756 | 0.50634        | 0.03228         |
| Factor2<br>(MEAN)<br>(Restrictive communicat or) | 0.02  | Man                       | 101 | 3.1832 | 1.37427        | 0.13674         |
|                                                  |       | Women                     | 242 | 2.686  | 1.29014        | 0.08293         |
| Factor3<br>(MEAN)                                | 0.311 | Man                       | 102 | 1.4118 | 0.8221         | 0.0814          |

| Factor                                    |        | Question                      |     |        |                |                 |
|-------------------------------------------|--------|-------------------------------|-----|--------|----------------|-----------------|
|                                           | Sig    | Type of the GPs' practice     | N   | Mean   | Std. Deviation | Std. Error Mean |
| (Informing communicator)                  |        |                               |     |        |                |                 |
|                                           |        | Women                         | 249 | 1.5087 | 0.8088         | 0.05126         |
| Factor4 (MEAN) (Strained communicator)    | 0.677  | Man                           | 102 | 2.4804 | 1.12997        | 0.11188         |
|                                           |        | Women                         | 242 | 2.4256 | 1.10386        | 0.07096         |
|                                           |        | Specialty – pediatric         | N   | Mean   | Std. Deviation | Std. Error Mean |
| Factor1 (MEAN) (Active communicator)      | 0.923  | Not pediatric                 | 240 | 1.5875 | 0.48888        | 0.03156         |
|                                           |        | Pediatric                     | 107 | 1.5813 | 0.57464        | 0.05555         |
| Factor2 (MEAN) (Restrictive communicator) | 0.035  | Not pediatric                 | 236 | 2.9343 | 1.30422        | 0.0849          |
|                                           |        | Pediatric                     | 107 | 2.6075 | 1.37365        | 0.1328          |
| Factor3 (MEAN) (Informing communicator)   | 0.002* | Not pediatric                 | 242 | 1.3829 | 0.72772        | 0.04678         |
|                                           |        | Pediatric                     | 109 | 1.6972 | 0.9434         | 0.09036         |
| Factor4 (MEAN) (Strained communicator)    | 0.796  | Not pediatric                 | 240 | 2.4521 | 1.13926        | 0.07354         |
|                                           |        | Pediatric                     | 104 | 2.4183 | 1.04536        | 0.10251         |
|                                           |        | Specialty – internal medicine | N   | Mean   | Std. Deviation | Std. Error Mean |
| Factor1 (MEAN) (Active communicator)      | 0.707  | Not internal medicine         | 261 | 1.5916 | 0.5413         | 0.03351         |
|                                           |        | Internal medicine             | 86  | 1.5674 | 0.43262        | 0.04665         |

| Factor                                           |               | Question                            |          |             |                       |                        |
|--------------------------------------------------|---------------|-------------------------------------|----------|-------------|-----------------------|------------------------|
|                                                  | Sig           | Type of the GPs' practice           | N        | Mean        | Std. Deviation        | Std. Error Mean        |
| <b>Factor2 (MEAN) (Restrictive communicator)</b> | <b>0.635</b>  | Not internal medicine               | 257      | 2.8521      | 1.33739               | 0.08342                |
|                                                  |               | Internal medicine                   | 86       | 2.7733      | 1.32545               | 0.14293                |
| <b>Factor3 (MEAN) (Informing communicator)</b>   | <b>0.148</b>  | Not internal medicine               | 264      | 1.4444      | 0.79994               | 0.04923                |
|                                                  |               | Internal medicine                   | 87       | 1.59        | 0.84557               | 0.09065                |
| <b>Factor4 (MEAN) (Strained communicator)</b>    | <b>0,238*</b> | Not internal medicine               | 258      | 2.4806      | 1.13813               | 0.07086                |
|                                                  |               | Internal medicine                   | 86       | 2.3256      | 1.01971               | 0.10996                |
|                                                  |               | <b>Specialty – general medicine</b> | <b>N</b> | <b>Mean</b> | <b>Std. Deviation</b> | <b>Std. Error Mean</b> |
| <b>Factor1 (MEAN) (Active communicator)</b>      | <b>0.482</b>  | Not general medicine                | 122      | 1.6131      | 0.55966               | 0.05067                |
|                                                  |               | General medicine                    | 225      | 1.5707      | 0.49138               | 0.03276                |
| <b>Factor2 (MEAN) (Restrictive communicator)</b> | <b>0.004</b>  | Not general medicine                | 121      | 2.5496      | 1.33761               | 0.1216                 |
|                                                  |               | General medicine                    | 222      | 2.9865      | 1.30776               | 0.08777                |
| <b>Factor3 (MEAN) (Informing communicator)</b>   | <b>0.00*</b>  | Not general medicine                | 126      | 1.7037      | 0.87048               | 0.07755                |
|                                                  |               | General medicine                    | 225      | 1.3556      | 0.75198               | 0.05013                |
| <b>Factor4 (MEAN) (Strained communicator)</b>    | <b>0.244</b>  | Not general medicine                | 121      | 2.3471      | 1.08751               | 0.09886                |
|                                                  |               | General medicine                    | 223      | 2.4933      | 1.12153               | 0.0751                 |

\*Equal variances not assumed

**Table S4.** Parental hesitancy and attitudes towards vaccines. ANOVA analysis.

| <b>Do the parents of children from your practice have doubts regarding the administration of vaccines from the mandatory children's immunization calendar?</b>                                                                                 |                   | <b>Factor1<br/>MEAN<br/>(Active<br/>communicat<br/>or)</b> | <b>Factor2<br/>MEAN<br/>(Restrictive<br/>communicat<br/>or)</b> | <b>Factor3<br/>MEAN<br/>(Informing<br/>communicat<br/>or)</b> | <b>Factor4<br/>MEAN<br/>(Strained<br/>communicat<br/>or)</b> |
|------------------------------------------------------------------------------------------------------------------------------------------------------------------------------------------------------------------------------------------------|-------------------|------------------------------------------------------------|-----------------------------------------------------------------|---------------------------------------------------------------|--------------------------------------------------------------|
|                                                                                                                                                                                                                                                |                   | 7.626                                                      | 4.41                                                            | 2.227                                                         | 12.512                                                       |
| sig                                                                                                                                                                                                                                            |                   | 0.001                                                      | 0.013                                                           | 0.109                                                         | 0.000                                                        |
|                                                                                                                                                                                                                                                |                   | Factor1MEAN                                                | Factor2_meaN                                                    | Factor3MEAN                                                   | Factor4MEAN                                                  |
| Yes, often                                                                                                                                                                                                                                     | Mean              | 1.8085                                                     | 3.375                                                           | 1.3958                                                        | 1.7979                                                       |
|                                                                                                                                                                                                                                                | N                 | 47                                                         | 44                                                              | 48                                                            | 47                                                           |
|                                                                                                                                                                                                                                                | Std.<br>Deviation | 0.59557                                                    | 1.33                                                            | 0.8155                                                        | 0.83834                                                      |
| Yes, rarely                                                                                                                                                                                                                                    | Mean              | 1.6011                                                     | 2.7201                                                          | 1.5663                                                        | 2.4293                                                       |
|                                                                                                                                                                                                                                                | N                 | 184                                                        | 184                                                             | 186                                                           | 184                                                          |
|                                                                                                                                                                                                                                                | Std.<br>Deviation | 0.49412                                                    | 1.25523                                                         | 0.87375                                                       | 0.98231                                                      |
| No                                                                                                                                                                                                                                             | Mean              | 1.4707                                                     | 2.8043                                                          | 1.3789                                                        | 2.7301                                                       |
|                                                                                                                                                                                                                                                | N                 | 116                                                        | 115                                                             | 117                                                           | 113                                                          |
|                                                                                                                                                                                                                                                | Std.<br>Deviation | 0.48652                                                    | 1.41374                                                         | 0.6933                                                        | 1.28528                                                      |
| Total                                                                                                                                                                                                                                          | Mean              | 1.5856                                                     | 2.8324                                                          | 1.4805                                                        | 2.4419                                                       |
|                                                                                                                                                                                                                                                | N                 | 347                                                        | 343                                                             | 351                                                           | 344                                                          |
|                                                                                                                                                                                                                                                | Std.<br>Deviation | 0.51601                                                    | 1.33291                                                         | 0.81271                                                       | 1.1103                                                       |
| <b>In your practice as a General Practitioner in the last 5 years, have there been any cases of illnesses from diseases against which mandatory immunizations from the children's immunization calendar in Bulgaria are currently applied?</b> |                   | <b>Factor1<br/>MEAN<br/>(Active<br/>communicat<br/>or)</b> | <b>Factor2<br/>MEAN<br/>(Restrictive<br/>communicat<br/>or)</b> | <b>Factor3<br/>MEAN<br/>(Informing<br/>communicat<br/>or)</b> | <b>Factor4<br/>MEAN<br/>(Strained<br/>communicat<br/>or)</b> |
| F                                                                                                                                                                                                                                              |                   | 1.317                                                      | 0.722                                                           | 6.059                                                         | 1.488                                                        |
| sig                                                                                                                                                                                                                                            |                   | 0.269                                                      | 0.487                                                           | 0.003                                                         | 0.227                                                        |
| Yes, without administered vaccine                                                                                                                                                                                                              | Mean              | 1.5                                                        | 2.875                                                           | 2.1458                                                        | 2                                                            |
|                                                                                                                                                                                                                                                | N                 | 16                                                         | 16                                                              | 16                                                            | 16                                                           |
|                                                                                                                                                                                                                                                | Std.<br>Deviation | 0.41952                                                    | 1.53297                                                         | 1.38761                                                       | 0.98319                                                      |
| Yes, with administered vaccine                                                                                                                                                                                                                 | Mean              | 1.775                                                      | 3.2188                                                          | 1.6                                                           | 2.3125                                                       |

|                                                                                                                                                                                                                             |                   |                                                            |                                                                 |                                                               |                                                              |
|-----------------------------------------------------------------------------------------------------------------------------------------------------------------------------------------------------------------------------|-------------------|------------------------------------------------------------|-----------------------------------------------------------------|---------------------------------------------------------------|--------------------------------------------------------------|
| <b>Do the parents of children from your practice have doubts regarding the administration of vaccines from the mandatory children's immunization calendar?</b>                                                              |                   | <b>Factor1<br/>MEAN<br/>(Active<br/>communicat<br/>or)</b> | <b>Factor2<br/>MEAN<br/>(Restrictive<br/>communicat<br/>or)</b> | <b>Factor3<br/>MEAN<br/>(Informing<br/>communicat<br/>or)</b> | <b>Factor4<br/>MEAN<br/>(Strained<br/>communicat<br/>or)</b> |
|                                                                                                                                                                                                                             | N                 | 16                                                         | 16                                                              | 15                                                            | 16                                                           |
|                                                                                                                                                                                                                             | Std.<br>Deviation | 0.80953                                                    | 1.21063                                                         | 0.74748                                                       | 1.23659                                                      |
| No                                                                                                                                                                                                                          | Mean              | 1.5803                                                     | 2.8103                                                          | 1.4417                                                        | 2.4712                                                       |
|                                                                                                                                                                                                                             | N                 | 315                                                        | 311                                                             | 320                                                           | 312                                                          |
|                                                                                                                                                                                                                             | Std.<br>Deviation | 0.50146                                                    | 1.32933                                                         | 0.765                                                         | 1.10791                                                      |
| Total                                                                                                                                                                                                                       | Mean              | 1.5856                                                     | 2.8324                                                          | 1.4805                                                        | 2.4419                                                       |
|                                                                                                                                                                                                                             | N                 | 347                                                        | 343                                                             | 351                                                           | 344                                                          |
|                                                                                                                                                                                                                             | Std.<br>Deviation | 0.51601                                                    | 1.33291                                                         | 0.81271                                                       | 1.1103                                                       |
| <b>In your practice as a GP in the last 5 years, have there been any cases of serious adverse effects following compulsory vaccination of children that were potentially associated with hospitalization or disability?</b> |                   | <b>Factor1<br/>MEAN<br/>(Active<br/>communicat<br/>or)</b> | <b>Factor2<br/>MEAN<br/>(Restrictive<br/>communicat<br/>or)</b> | <b>Factor3<br/>MEAN<br/>(Informing<br/>communicat<br/>or)</b> | <b>Factor4<br/>MEAN<br/>(Strained<br/>communicat<br/>or)</b> |
| F                                                                                                                                                                                                                           |                   | 0.014                                                      | 2.356                                                           | 1.095                                                         | 2.084                                                        |
| sig                                                                                                                                                                                                                         |                   | 0.907                                                      | 0.126                                                           | 0.296                                                         | 0.15                                                         |
| Yes                                                                                                                                                                                                                         | Mean              | 1.6                                                        | 3.3056                                                          | 1.6667                                                        | 2.0588                                                       |
|                                                                                                                                                                                                                             | N                 | 18                                                         | 18                                                              | 20                                                            | 17                                                           |
|                                                                                                                                                                                                                             | Std.<br>Deviation | 0.59409                                                    | 1.53526                                                         | 0.91127                                                       | 0.8639                                                       |
| No                                                                                                                                                                                                                          | Mean              | 1.5854                                                     | 2.8117                                                          | 1.4707                                                        | 2.4555                                                       |
|                                                                                                                                                                                                                             | N                 | 328                                                        | 324                                                             | 330                                                           | 326                                                          |
|                                                                                                                                                                                                                             | Std.<br>Deviation | 0.5131                                                     | 1.31674                                                         | 0.80734                                                       | 1.11508                                                      |
| Total                                                                                                                                                                                                                       | Mean              | 1.5861                                                     | 2.8377                                                          | 1.4819                                                        | 2.4359                                                       |
|                                                                                                                                                                                                                             | N                 | 346                                                        | 342                                                             | 350                                                           | 343                                                          |
|                                                                                                                                                                                                                             | Std.<br>Deviation | 0.51666                                                    | 1.33116                                                         | 0.81346                                                       | 1.10632                                                      |
| <b>Has there been a change in parents' vaccine attitudes about mandatory childhood vaccines since the start of the Covid-19 pandemic?</b>                                                                                   |                   | <b>Factor1<br/>MEAN<br/>(Active<br/>communicat<br/>or)</b> | <b>Factor2<br/>MEAN<br/>(Restrictive<br/>communicat<br/>or)</b> | <b>Factor3<br/>MEAN<br/>(Informing<br/>communicat<br/>or)</b> | <b>Factor4<br/>MEAN<br/>(Strained<br/>communicat<br/>or)</b> |
| F                                                                                                                                                                                                                           |                   | 1.495                                                      | 1.549                                                           | 0.362                                                         | 9.051                                                        |
| sig                                                                                                                                                                                                                         |                   | 0.216                                                      | 0.202                                                           | 0.78                                                          | 0.000                                                        |

| <b>Do the parents of children from your practice have doubts regarding the administration of vaccines from the mandatory children's immunization calendar?</b> |                   | <b>Factor1<br/>MEAN<br/>(Active<br/>communicat<br/>or)</b> | <b>Factor2<br/>MEAN<br/>(Restrictive<br/>communicat<br/>or)</b> | <b>Factor3<br/>MEAN<br/>(Informing<br/>communicat<br/>or)</b> | <b>Factor4<br/>MEAN<br/>(Strained<br/>communicat<br/>or)</b> |
|----------------------------------------------------------------------------------------------------------------------------------------------------------------|-------------------|------------------------------------------------------------|-----------------------------------------------------------------|---------------------------------------------------------------|--------------------------------------------------------------|
| Yes, there are less vaccine hesitant parents                                                                                                                   | Mean              | 1.555                                                      | 2.575                                                           | 1.4167                                                        | 2.3537                                                       |
|                                                                                                                                                                | N                 | 40                                                         | 40                                                              | 44                                                            | 41                                                           |
|                                                                                                                                                                | Std.<br>Deviation | 0.59137                                                    | 1.25856                                                         | 0.71211                                                       | 1.10817                                                      |
| Yes, there are more vaccine hesitant parents                                                                                                                   | Mean              | 1.6716                                                     | 3.0421                                                          | 1.5278                                                        | 2.0189                                                       |
|                                                                                                                                                                | N                 | 109                                                        | 107                                                             | 108                                                           | 106                                                          |
|                                                                                                                                                                | Std.<br>Deviation | 0.4948                                                     | 1.30514                                                         | 0.86122                                                       | 0.88889                                                      |
| No                                                                                                                                                             | Mean              | 1.5417                                                     | 2.7787                                                          | 1.4821                                                        | 2.681                                                        |
|                                                                                                                                                                | N                 | 175                                                        | 174                                                             | 177                                                           | 174                                                          |
|                                                                                                                                                                | Std.<br>Deviation | 0.52569                                                    | 1.33263                                                         | 0.83852                                                       | 1.15064                                                      |
| I can not answer                                                                                                                                               | Mean              | 1.5652                                                     | 2.7045                                                          | 1.3636                                                        | 2.7391                                                       |
|                                                                                                                                                                | N                 | 23                                                         | 22                                                              | 22                                                            | 23                                                           |
|                                                                                                                                                                | Std.<br>Deviation | 0.35498                                                    | 1.5404                                                          | 0.51341                                                       | 1.17618                                                      |
| Total                                                                                                                                                          | Mean              | 1.5856                                                     | 2.8324                                                          | 1.4805                                                        | 2.4419                                                       |
|                                                                                                                                                                | N                 | 347                                                        | 343                                                             | 351                                                           | 344                                                          |
|                                                                                                                                                                | Std.<br>Deviation | 0.51601                                                    | 1.33291                                                         | 0.81271                                                       | 1.1103                                                       |

**Table S5.** Communication practices (difficulties in communication and recommendations of non-mandatory vaccines). ANOVA analysis.

| <b>To what extent do you have difficulty communicating with parents regarding the vaccination of their children?</b> |                   | <b>Factor1<br/>MEAN<br/>(Active<br/>communicat<br/>or)</b> | <b>Factor2<br/>MEAN<br/>(Restrictive<br/>communicat<br/>or)</b> | <b>Factor3<br/>MEAN<br/>(Informing<br/>communicat<br/>or)</b> | <b>Factor4<br/>MEAN<br/>(Strained<br/>communicat<br/>or)</b> |
|----------------------------------------------------------------------------------------------------------------------|-------------------|------------------------------------------------------------|-----------------------------------------------------------------|---------------------------------------------------------------|--------------------------------------------------------------|
| F                                                                                                                    |                   | 5.781                                                      | 2.059                                                           | 0.48                                                          | 16.484                                                       |
| sig                                                                                                                  |                   | 0.001                                                      | 0.105                                                           | 0.696                                                         | 0.000                                                        |
| To a great extent                                                                                                    | Mean              | 1.9125                                                     | 3.5938                                                          | 1.3922                                                        | 1.4706                                                       |
|                                                                                                                      | N                 | 16                                                         | 16                                                              | 17                                                            | 17                                                           |
|                                                                                                                      | Std.<br>Deviation | 0.47311                                                    | 1.14337                                                         | 0.66911                                                       | 0.92653                                                      |
| To some extent                                                                                                       | Mean              | 1.6172                                                     | 2.9                                                             | 1.3785                                                        | 2.1207                                                       |
|                                                                                                                      | N                 | 58                                                         | 55                                                              | 59                                                            | 58                                                           |

| To what extent do you have difficulty communicating with parents regarding the vaccination of their children? |                   | Factor1<br>MEAN<br>(Active<br>communicat<br>or) | Factor2<br>MEAN<br>(Restrictive<br>communicat<br>or) | Factor3<br>MEAN<br>(Informing<br>communicat<br>or) | Factor4<br>MEAN<br>(Strained<br>communicat<br>or) |
|---------------------------------------------------------------------------------------------------------------|-------------------|-------------------------------------------------|------------------------------------------------------|----------------------------------------------------|---------------------------------------------------|
|                                                                                                               | Std.<br>Deviation | 0.43413                                         | 1.24499                                              | 0.64759                                            | 0.82881                                           |
| To a small extent                                                                                             | Mean              | 1.6785                                          | 2.8224                                               | 1.5121                                             | 2.1881                                            |
|                                                                                                               | N                 | 107                                             | 107                                                  | 110                                                | 109                                               |
|                                                                                                               | Std.<br>Deviation | 0.5304                                          | 1.30176                                              | 0.8334                                             | 0.89698                                           |
| I do not experience any difficulties in communicating with parents                                            | Mean              | 1.4831                                          | 2.7424                                               | 1.5051                                             | 2.8344                                            |
|                                                                                                               | N                 | 166                                             | 165                                                  | 165                                                | 160                                               |
|                                                                                                               | Std.<br>Deviation | 0.51506                                         | 1.38327                                              | 0.86611                                            | 1.20105                                           |
| Total                                                                                                         | Mean              | 1.5856                                          | 2.8324                                               | 1.4805                                             | 2.4419                                            |
|                                                                                                               | N                 | 347                                             | 343                                                  | 351                                                | 344                                               |
|                                                                                                               | Std.<br>Deviation | 0.51601                                         | 1.33291                                              | 0.81271                                            | 1.1103                                            |
| How often do you recommend vaccines that are NOT included in the mandatory immunization schedule?             |                   | Factor1<br>MEAN<br>(Active<br>communicat<br>or) | Factor2<br>MEAN<br>(Restrictive<br>communicat<br>or) | Factor3<br>MEAN<br>(Informing<br>communicat<br>or) | Factor4<br>MEAN<br>(Strained<br>communicat<br>or) |
| F                                                                                                             |                   | 6.513                                           | 2.63                                                 | 0.946                                              | 2.911                                             |
| sig                                                                                                           |                   | 0.000                                           | 0.034                                                | 0.437                                              | 0.022                                             |
| Always                                                                                                        | Mean              | 1.4588                                          | 2.6893                                               | 1.3556                                             | 2.6667                                            |
|                                                                                                               | N                 | 102                                             | 103                                                  | 105                                                | 102                                               |
|                                                                                                               | Std.<br>Deviation | 0.35554                                         | 1.38641                                              | 0.76414                                            | 1.09303                                           |
| Often                                                                                                         | Mean              | 1.5567                                          | 2.9444                                               | 1.5438                                             | 2.4387                                            |
|                                                                                                               | N                 | 157                                             | 153                                                  | 160                                                | 155                                               |
|                                                                                                               | Std.<br>Deviation | 0.49475                                         | 1.26251                                              | 0.8348                                             | 1.09505                                           |
| Rarely                                                                                                        | Mean              | 1.7231                                          | 2.5781                                               | 1.5104                                             | 2.1797                                            |
|                                                                                                               | N                 | 65                                              | 64                                                   | 64                                                 | 64                                                |
|                                                                                                               | Std.              | 0.57738                                         | 1.33992                                              | 0.73695                                            | 1.11756                                           |

| To what extent do you have difficulty communicating with parents regarding the vaccination of their children? |                   | Factor1<br>MEAN<br>(Active<br>communicat<br>or) | Factor2<br>MEAN<br>(Restrictive<br>communicat<br>or) | Factor3<br>MEAN<br>(Informing<br>communicat<br>or) | Factor4<br>MEAN<br>(Strained<br>communicat<br>or) |
|---------------------------------------------------------------------------------------------------------------|-------------------|-------------------------------------------------|------------------------------------------------------|----------------------------------------------------|---------------------------------------------------|
|                                                                                                               | Deviation         |                                                 |                                                      |                                                    |                                                   |
| Never                                                                                                         | Mean              | 2.0222                                          | 3.5833                                               | 1.5686                                             | 2.3889                                            |
|                                                                                                               | N                 | 18                                              | 18                                                   | 17                                                 | 18                                                |
|                                                                                                               | Std.<br>Deviation | 0.87283                                         | 1.29762                                              | 1.18301                                            | 1.18266                                           |
| I cannot answer                                                                                               | Mean              | 1.72                                            | 2.9                                                  | 1.4                                                | 1.5                                               |
|                                                                                                               | N                 | 5                                               | 5                                                    | 5                                                  | 5                                                 |
|                                                                                                               | Std.<br>Deviation | 0.30332                                         | 1.51658                                              | 0.36515                                            | 0.5                                               |
| Total                                                                                                         | Mean              | 1.5856                                          | 2.8324                                               | 1.4805                                             | 2.4419                                            |
|                                                                                                               | N                 | 347                                             | 343                                                  | 351                                                | 344                                               |
|                                                                                                               | Std.<br>Deviation | 0.51601                                         | 1.33291                                              | 0.81271                                            | 1.1103                                            |
